# Supplementary material for: Intracellular delivery of protein drugs with an autonomously lysing bacterial system reduces tumor growth and metastases
Source: PubMed Central journal article supplement (PMC8531320; doi:10.1038/s41467-021-26367-9), 2021-10-21
Supplement: 41467_2021_26367_MOESM1_ESM.pdf [file 41467_2021_26367_MOESM1_ESM.pdf]

## Supplemental Information

### Intracellular delivery of protein drugs with an autonomously lysing bacterial system reduces tumor growth and metastases

Vishnu Raman<sup>\*,1,2</sup>, Nele Van Dessel<sup>\*,1,2</sup>, Christopher L. Hall<sup>1,2</sup>, Victoria E. Wetherby<sup>2</sup>, Samantha A. Whitney<sup>1</sup>, Emily L. Kolewe<sup>1</sup>, Shoshana M.K. Bloom<sup>1</sup>, Abhinav Sharma<sup>1</sup>, Jeanne A. Hardy<sup>3,4,5</sup>, Mathieu Bollen<sup>6</sup>, Aleyde Van Eynde<sup>6</sup>, Neil S. Forbes<sup>1,2,4,5,†</sup>

\* Both authors contributed equally to this manuscript

<sup>1</sup>Department of Chemical Engineering  
University of Massachusetts, Amherst  
Amherst, MA, USA

<sup>2</sup>Ernest Pharmaceuticals, LLC  
Hadley, MA, USA

<sup>3</sup>Department of Chemistry  
University of Massachusetts, Amherst  
Amherst, MA, USA

<sup>4</sup>Molecular and Cell Biology Program  
University of Massachusetts, Amherst  
Amherst, MA, USA

<sup>5</sup>Institute for Applied Life Science  
University of Massachusetts, Amherst  
Amherst, MA, USA

<sup>6</sup>Laboratory of Biosignaling & Therapeutics  
Department of Cellular and Molecular Medicine  
KU Leuven  
Leuven, Belgium

†Corresponding author

Correspondence to:  
Professor Neil S Forbes  
Department of Chemical Engineering  
University of Massachusetts, Amherst  
159 Goessmann Laboratory  
686 North Pleasant St.  
Amherst, Massachusetts 01003, USA  
Email: [forbes@umass.edu](mailto:forbes@umass.edu)  
Tel.: +1 413 577 0132

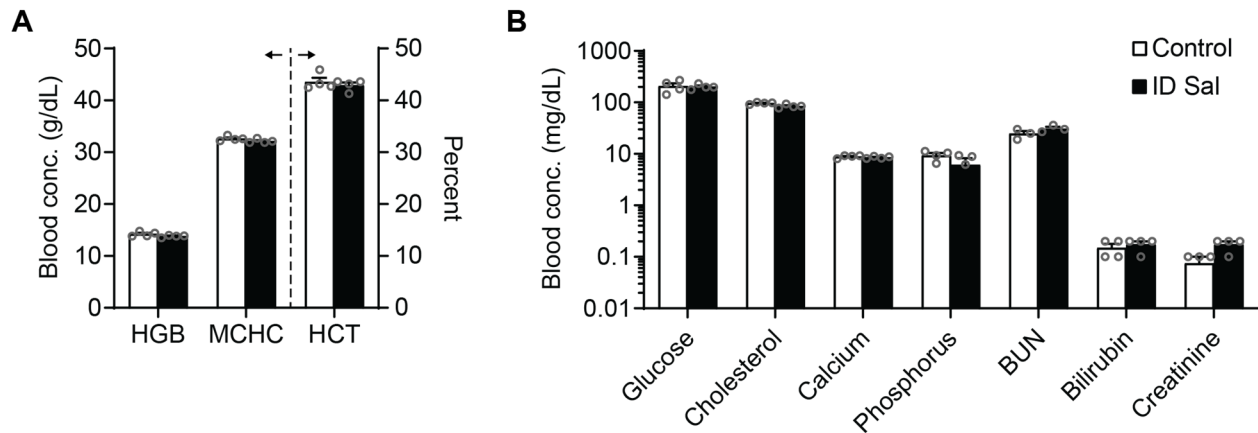

**Supplementary Figure 1. Additional measures of blood or liver toxicity. A,B)** Tumor-free BALB/c mice were injected with  $1 \times 10^7$  ID Salmonella, and control mice were injected with saline ( $n = 4$ ). After 14 days, whole blood was isolated by percutaneous cardiac puncture. Comprehensive hematology (**A**) and chemistry profiling (**B**) was conducted by *Idexx Laboratories* (Grafton, MA). No differences were detected for any measurement of blood or liver toxicity. Abbreviations are BUN, blood urea nitrogen; HCT, hematocrit; HGB, hemoglobin; and MCHC, mean corpuscular hemoglobin concentration. Data are shown as means  $\pm$  SEM.

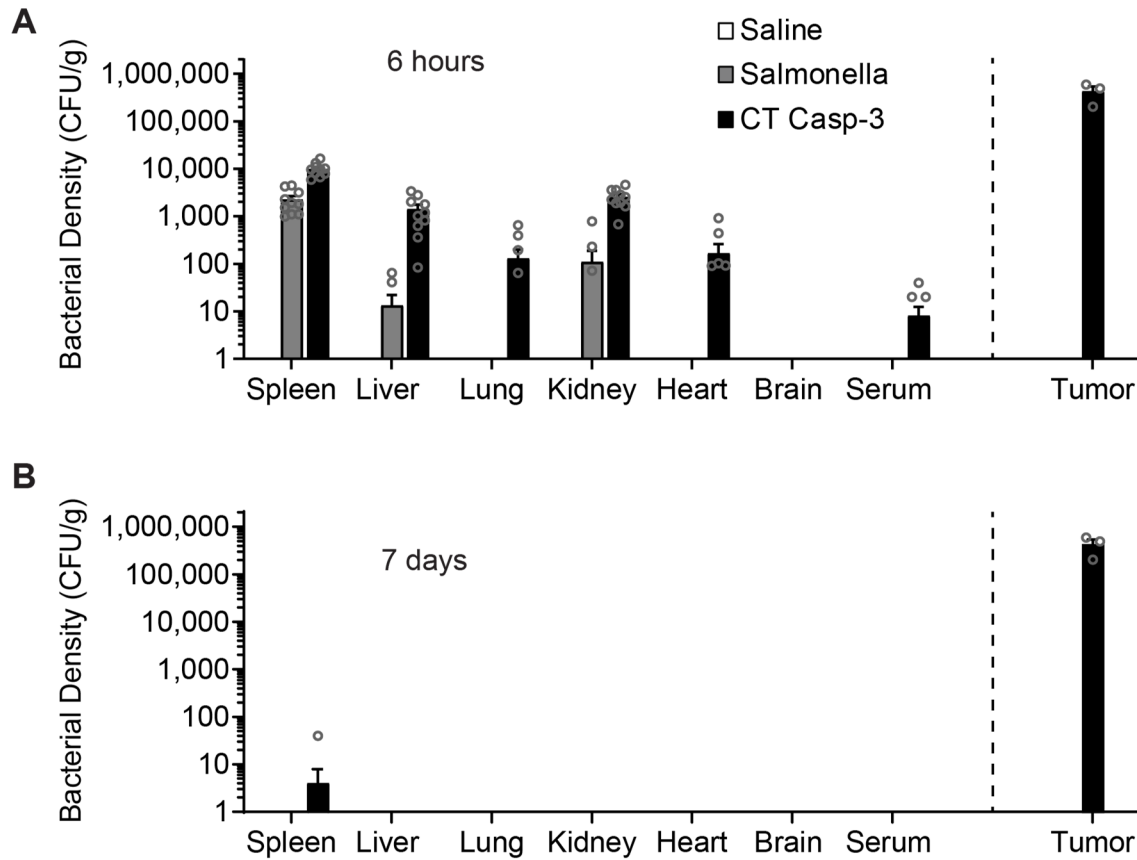

**Supplementary Figure 2. Biodistribution of *CT Casp-3* Salmonella at 6 hours and 7 days.** Tumor-free male C57BL/J mice were intravenously injected at 22 weeks of age with either saline (control),  $1 \times 10^7$  CFU/mouse of ID Salmonella, or  $1 \times 10^7$  CFU/mouse of *CT Casp-3* Salmonella with ( $n = 10$  for both time points). **A**) After 6 h, tissues were excised and weighed: spleen, liver, lung, kidney, heart, brain and serum. Organs were minced and cultured on agar plates. The bacterial density in the tumors of tumor-bearing mice (from Figure 5b) at 72 h is provided as a reference. No bacteria were detected in saline controls. **B**) After 7 days, bacterial density was determined from an additional set of identically treated mice. No bacteria were detected in most of the organs. The bacterial density in the spleens of mice treated with *CT Casp-3* Salmonella was close to the detection limit. The presence of bacteria in healthy organs is common six hours after intravenous injection (as seen in a). At this time, bacteria are still present in the blood in these organs. Because the bacteria do not interact with the tissues, no adverse effects were seen (as shown in Figures 5c-e, S1 and S4). With time, the immune system clears the bacteria from the blood and organs, typically within 24 h, as can be seen by the lack of bacteria in most organs after 7 days (b). Data are shown as means  $\pm$  SEM.

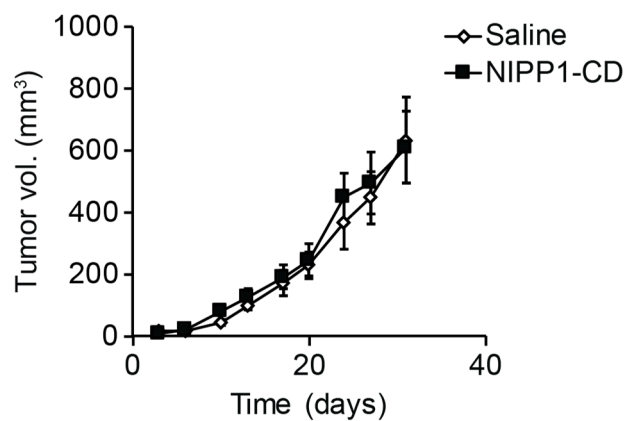

**Supplementary Figure 3. Efficacy of ID Salmonella delivery of NIPP1-CD.** *NIPP1-CD* Salmonella ( $1 \times 10^7$  CFU/mouse) were administered to BALB/c mice with subcutaneous 4T1 tumors by intravenous injection. No difference in tumor volume was observed between NIPP1-CD ( $n = 5$ ) and saline controls ( $n = 4$ ). Data are shown as means  $\pm$  SEM.

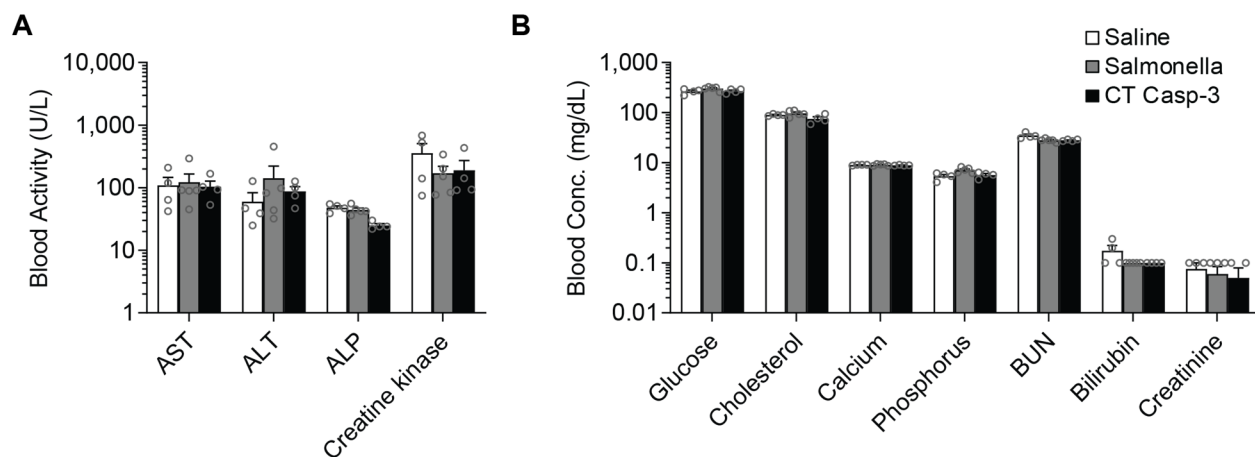

**Supplementary Figure 4. Toxicity of ID Salmonella with CT Casp-3.** **A)** Chemistry profiling of the blood drawn from tumor-free male C57BL/J mice ( $n = 4$ ). Mice were intravenously injected at 22 weeks of age with either saline (control),  $1 \times 10^7$  CFU/mouse of ID Salmonella, or  $1 \times 10^7$  CFU/mouse of ID Salmonella with CT Casp-3. Sera were collected seven days after injection and chemistry profiling was conducted by *IDEXX Laboratories* (Grafton, MA). No differences were detected for any measurement of liver toxicity. Markers of liver damage are ALP, alkaline phosphatase; ALT, alanine transaminase; and AST, aspartate transaminase. **B)** Additional measures of liver toxicity of the blood from the mice in (A). No differences were detected for any measurement. BUN is blood urea nitrogen. Data are shown as means  $\pm$  SEM.

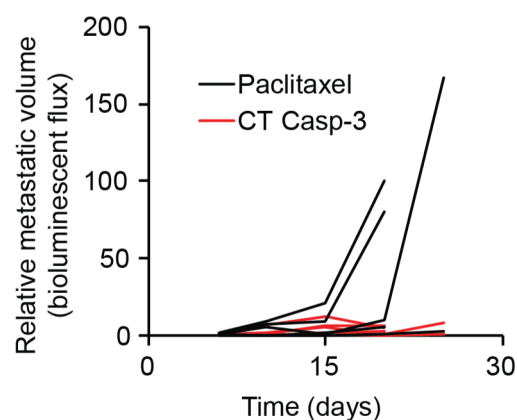

**Supplementary Figure 5. CT Casp-3 Salmonella prevented growth of metastases in individual mice.** Lung metastases were formed in BALB/c mice by intravenous injection of  $5 \times 10^4$  luciferase-expressing 4T1 cells (see Figure 7G). Mice were treated with either  $1 \times 10^7$  CFU of CT Casp-3 Salmonella or 10 mg/kg paclitaxel ( $n = 6$ ). Metastatic volume was measured with bioluminescence imaging after IP injection of 100  $\mu$ l of 30 mg/ml D-luciferin, and is reported relative to initial volume. Metastases grew exponentially in three mice treated with paclitaxel, but did not grow in any mice treated with CT Casp-3.

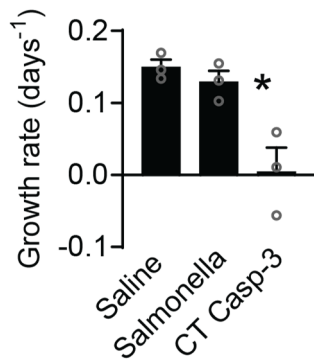

**Supplementary Figure 6. Tumor growth rate.** In C57L/J mice with subcutaneous Hepa 1-6 liver tumors (Figure 7I-J), treatment with *CT Casp-3* Salmonella significantly reduced tumor growth rate compared to both saline and bacterial (ID Salmonella) controls (\*,  $P = 0.027$ ;  $n = 3$ ). Data are shown as means  $\pm$  SEM. The statistical comparison is a two-tailed, unpaired Student's *t* test. The asterisk (\*) indicates significance of  $P < 0.05$ .

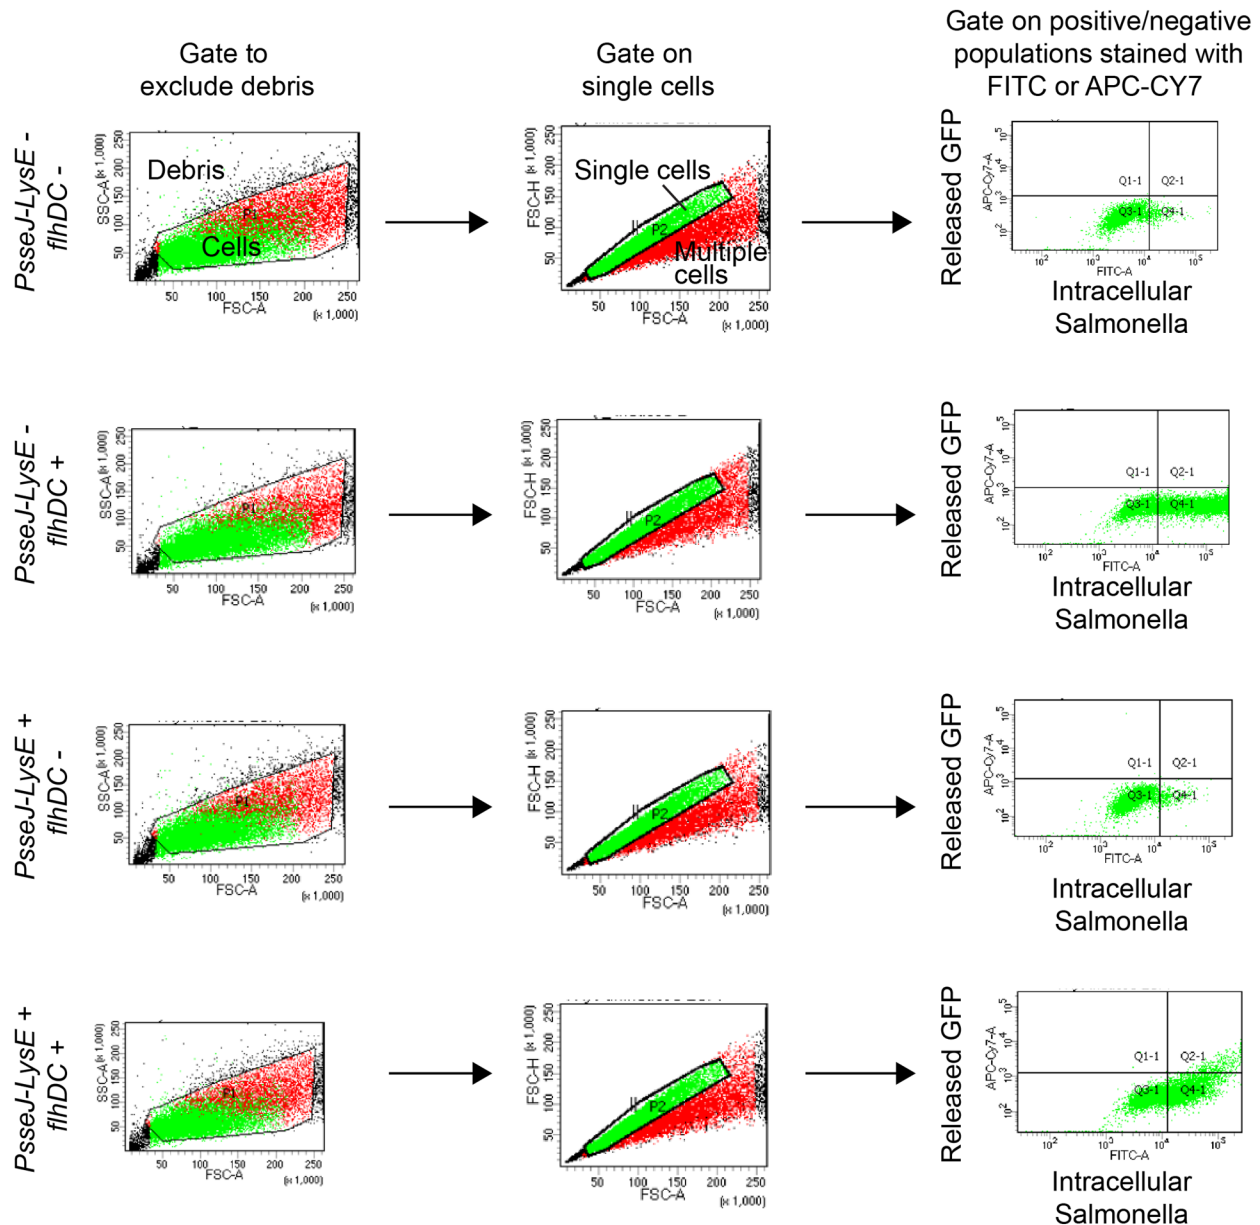

**Supplementary Figure 7. Flow cytometry gating strategy.** IDf+ Salmonella were administered to 4T1 cancer cells (see Figure 4B). Four different conditions were investigated: IDf+ Salmonella without *Pssej-LysE* and without arabinose induction of *PBAD-flhDC* (*Pssej-LysE* -, *flhDC* -); without *Pssej-LysE* and with induction of *PBAD-flhDC* with 20 mM arabinose (*Pssej-LysE* -, *flhDC* +); with *Pssej-LysE* and without induction (*Pssej-LysE* +, *flhDC* -); with *Pssej-LysE* and with induction (*Pssej-LysE* +, *flhDC* +). After invasion and delivery, the 4T1 cells were harvested, fixed and stained for *Salmonella* (FITC) and myc-tagged GFP (Dylight 755; APC-CY7). The gating strategy for each condition is shown. Cells were first gated to exclude debris and then gated on single cells. FITC and APC-CY7 gates were used to quantify the percentage of cells with intracellular *Salmonella* and released GFP-myc, respectively. The four rightmost plots are the images in Figure 4B of the manuscript.

**Supplementary Table 1. Bacterial strains**

| Strain                  | Background / Knockouts                                         | Plas mid | Genetic functions                                         | Description                                                                                                               |
|-------------------------|----------------------------------------------------------------|----------|-----------------------------------------------------------|---------------------------------------------------------------------------------------------------------------------------|
| <i>Parental (Par)</i>   | $\Delta msbB$ , $\Delta purI$ ,<br>$\Delta xyl$ , $\Delta asd$ | -        | -                                                         | Non-pathogenic therapeutic Salmonella; deletion of <i>asd</i> enables balanced lethal system to maintain plasmids in vivo |
| $\Delta flhD$ Sal       | $\Delta flhD$ Par                                              | -        | -                                                         | Parental Salmonella with <i>flhD</i> deletion; non-motile                                                                 |
| Intracellular reporting | <i>Par</i>                                                     | P1       | <i>PsseJ-GFP</i>                                          | Intracellularly inducible GFP                                                                                             |
| <i>flhDC</i> Sal        | $\Delta flhD$ Par                                              | P2       | <i>PBAD-flhDC</i><br><i>Plac-GFP</i>                      | Re-expresses <i>flhDC</i> after induction with arabinose<br>Constitutively expresses GFP                                  |
| <i>flhDC</i> reporting  | $\Delta flhD$ Par                                              | P4       | <i>PBAD-flhDC</i><br><i>PsseJ-GFP</i>                     | Re-expresses <i>flhDC</i> after induction with arabinose<br>Intracellularly inducible GFP                                 |
| <i>PsifA</i>            | <i>Par</i>                                                     | P5       | <i>PsifA-GFP</i>                                          | Expresses GFP after activation of <i>PsifA</i> promoter                                                                   |
| <i>PBAD-LysE</i>        | <i>Par</i>                                                     | P6       | <i>PBAD-LysE</i>                                          | Bacteria lyse after activation with arabinose                                                                             |
| ID Sal                  | <i>Par</i>                                                     | P7       | <i>PsseJ-LysE</i><br><i>Plac-GFP</i>                      | Bacteria lyse after activation of <i>PsseJ</i> promoter<br>Constitutively expresses GFP                                   |
| $\Delta sifA$ ID Sal    | $\Delta sifA$ Par                                              | P7       | <i>PsseJ-LysE</i><br><i>Plac-GFP</i>                      | Predominantly accumulates in the cytoplasm of cells<br>Lyses after invasion<br>Constitutively expresses GFP               |
| $\Delta sseJ$ ID Sal    | $\Delta sseJ$ Par                                              | P7       | <i>PsseJ-LysE</i><br><i>Plac-GFP</i>                      | Predominantly accumulate in SCVs<br>Lyses after invasion<br>Constitutively expresses GFP                                  |
| IDf+ Sal                | $\Delta flhD$ Par                                              | P8       | <i>Plac-GFP</i><br><i>PBAD-flhDC</i><br><i>PsseJ-LysE</i> | Re-expresses <i>flhDC</i> after induction with arabinose<br>Lyses after invasion<br>Constitutively expresses GFP          |
| <i>ID Sal-luc</i>       | <i>Par</i>                                                     | P9       | <i>PsseJ-LysE</i><br><i>Plac-GFP</i><br><i>Plac-luc</i>   | Bacteria lyse after activation of <i>PsseJ</i> promoter<br>Constitutively expresses GFP and luciferase                    |
| <i>NB</i>               | <i>Par</i>                                                     | P10      | <i>PsseJ-LysE</i><br><i>PBAD-nano</i><br><i>Plac-GFP</i>  | Lyses after invasion<br>Controllably expresses nanobody against $\beta$ -actin                                            |



|                      |            |     |                                                                      |                                                                                             |
|----------------------|------------|-----|----------------------------------------------------------------------|---------------------------------------------------------------------------------------------|
|                      |            |     |                                                                      | Constitutively expresses GFP                                                                |
| <i>NIPP1-CD Sal</i>  | <i>Par</i> | P11 | <i>PsseJ-LysE</i><br><i>Plac-NIPP1</i><br><i>Plac-GFP</i>            | Lyses after invasion<br>Constitutively expresses NIPP1-<br>CD and GFP                       |
| <i>CT Casp-3 Sal</i> | <i>Par</i> | P12 | <i>PsseJ-LysE</i><br><i>PBAD-</i><br><i>Casp3</i><br><i>Plac-GFP</i> | Lyses after invasion<br>Controllably expresses CT<br>Casp-3<br>Constitutively expresses GFP |

**Supplementary Table 2. Plasmids**

| No. | Name                                     | Origin | Gene Maintenance                       | Gene Circuits                                                 | Purpose                                                                           |
|-----|------------------------------------------|--------|----------------------------------------|---------------------------------------------------------------|-----------------------------------------------------------------------------------|
| P1  | Intracellular reporting                  | ColE1  | Chlor <sup>a</sup><br>ASD <sup>b</sup> | <i>PsseJ-GFP</i>                                              | Expresses GFP after cell invasion                                                 |
| P2  | <i>flhDC</i> re-expressing               | ColE1  | Amp<br>ASD                             | <i>PBAD-flhDC</i><br><i>Plac-GFP-myc</i>                      | Re-expresses <i>flhDC</i> ;<br>Constitutively expresses GFP                       |
| P3  | <i>PBAD-flhDC</i>                        | ColE1  | Amp <sup>c</sup>                       | <i>PBAD-flhDC</i>                                             | Used in construction of P2                                                        |
| P4  | <i>flhDC</i> reporting                   | ColE1  | Amp                                    | <i>PBAD-flhDC</i><br><i>PsseJ-GFP-myc</i>                     | Measures invasion after <i>flhDC</i> re-expression                                |
| P5  | <i>PsifA</i> reporter plasmid            | ColE1  | Chlor<br>ASD                           | <i>PsifA-GFP</i>                                              | Expresses GFP after activation of <i>PsifA</i> promoter                           |
| P6  | Inducible lysis                          | ColE1  | Chlor<br>ASD                           | <i>PBAD-LysE</i>                                              | Lyses after activation with arabinose                                             |
| P7  | Intracellular lysis                      | ColE1  | Chlor<br>ASD                           | <i>PsseJ-LysE</i><br><i>Plac-GFP-myc</i>                      | Bacteria lyse after invasion; Constitutively expresses GFP                        |
| P8  | Intracellular lysis and induced invasion | ColE1  | AMP<br>ASD                             | <i>PsseJ-LysE</i><br><i>PBAD-flhDC</i><br><i>Plac-GFP-myc</i> | Lyses after invasion; Re-expresses <i>flhDC</i> ;<br>Constitutively expresses GFP |
| P9  | Luciferase                               | ColE1  | Chlor<br>ASD                           | <i>PsseJ-LysE</i><br><i>Plac-GFP-myc</i><br><i>Plac-luc</i>   | Bacteria lyse after invasion; Constitutively expresses GFP and luciferase         |
| P10 | Nanobody                                 | ColE1  | AMP<br>ASD                             | <i>PsseJ-LysE</i><br><i>PBAD-nano-flag</i>                    | Lyses after invasion;<br>Expresses flag-tagged nanobody against $\beta$ -actin    |
| P11 | NIPP1-CD                                 | ColE1  | Chlor<br>ASD                           | <i>PsseJ-LysE</i> <i>Plac-NIPP1</i>                           | Lyses after invasion;<br>Expresses NIPP1-CD                                       |
| P12 | CT Casp-3                                | ColE1  | AMP<br>ASD                             | <i>Plac-GFP</i><br><i>PsseJ-LysE</i><br><i>PBAD-Casp-3</i>    | Lyses after invasion;<br>Constitutively expresses GFP; Expresses CT Casp-3        |

<sup>a</sup>Chloramphenicol

<sup>b</sup>ASD (aspartate-semialdehyde dehydrogenase) is an essential enzyme for lysine synthesis and is necessary for the synthesis of peptidoglycan<sup>4</sup>. It is the key gene in the balanced lethal system developed by Nakayama et al.<sup>5</sup> to maintain genes in *Salmonella* after injection in vivo.

<sup>c</sup>Ampicillin

**Supplementary Table 3. Primers used for gene deletions**

| <b>Name</b> | <b>Primer sequence</b>                                                               | <b>Gene</b>         | <b>Template</b> |
|-------------|--------------------------------------------------------------------------------------|---------------------|-----------------|
| vr121       | FOFZCACGGGGTGC GGCTACGT CGCACAAAAATAA<br>AGTTGGTTATTCTGGGTCTTGAGCGATTGTGTAGGC        | <i>flhD</i> forward | pkd4            |
| vr309       | EOEFATCCTGAGTCAAACGGGTGATCGTCTGATGAT<br>CGTCAAACCGGAAAAATTAGCCATGGTCCATATGAA<br>TATC | <i>flhD</i> reverse | pkd4            |
| vr266       | FZEFAAAATGTTGGTTTTATCGGCTGGCGCGGAATG<br>GTCGGCTCTGTTCTGTCTTGAGCGATTGTGTAGGC          | <i>asd</i> forward  | pkd3            |
| vr268       | OZFOGCCAACTGGCGCAGCATTGACGCAGCGGCT<br>CGGCGGCGCCCCATAAATTAGCCATGGTCCATATG<br>AATATC  | <i>asd</i> reverse  | pkd3            |
| vr432       | FZEOCATTGAGTGTTGGACAGGGTTATTTACATCA<br>TCTATCAGTTCTGAGTCTTGAGCGATTGTGTAGGC           | <i>sseJ</i> forward | pkd4            |
| vr433       | ZZFZTCAGTGGAATAATGATGAGCTATAAACTTTCT<br>AACATTATGGCAAATTAGCCATGGTCCATATGAAT<br>ATC   | <i>sseJ</i> reverse | pkd4            |
| vr434       | FZEOCGATTACTATAGGGAATGGTTTTTTAAAAAGTG<br>AAATCCTTACCAAGTCTTGAGCGATTGTGTAGGC          | <i>sifA</i> forward | pkd4            |
| vr435       | ZZFZAAAAACAACATAAACAGCCGCTTTGTTGTTCT<br>GAGCGAACGTGTAAATTAGCCATGGTCCATATGAAT<br>ATC  | <i>sifA</i> reverse | pkd4            |

**Supplementary Table 4. Primers used for plasmid construction**

| <b>Name</b> | <b>Sequence</b>                                                                                                 | <b>Description</b>               |
|-------------|-----------------------------------------------------------------------------------------------------------------|----------------------------------|
| nd1         | AAAAAAACATGTGTGGAATTGTGAGCGGATAAC                                                                               | <i>Plac-GFP</i> forward          |
| nd2         | AAAAAAGACGTCTTATTTGTATAGTTCATCCATGCC                                                                            | <i>Plac-GFP</i> reverse          |
| nd3         | AAAAAAACATGTCACATAAAACACTAGCACTTT                                                                               | <i>PsseJ</i> forward             |
| nd4         | AAAAAATCTAGACCTCCTTACTTTATTAACAC                                                                                | <i>PsseJ</i> reverse             |
| nd5         | AAAAAAACATGTTATAAGCGATTAATTGCGCAA                                                                               | <i>PsifA</i> forward             |
| nd6         | AAAAAATCTAGATAATCTCACTTATACTGGAGT                                                                               | <i>PsifA</i> reverse             |
| nd7         | AAAAAACCATGGTTAAGAAGGAGATATACATATGG                                                                             | <i>LysE</i> forward (into PBAD)  |
| nd8         | AAAAAAGGTACCTCACTCCTTCCGCACGTAATT                                                                               | <i>LysE</i> reverse (into PBAD)  |
| nd9         | AAAAAATCTAGATTTAAGAAGGAGATATACATATGG                                                                            | <i>LysE</i> forward              |
| nd10        | AAAAAAGACGTCTCACTCCTTCCGCACGTAATT                                                                               | <i>LysE</i> reverse              |
| nd11        | AAAAAA GAGCTC GACTGGAAAGCGGGCAGTGA                                                                              | <i>Plac-GFP</i> forward          |
| nd12        | AAAAAA GAGCTC AAGCTTGCATGCCTGCAGGAG                                                                             | <i>Plac-GFP</i> reverse          |
| nd13        | TTTAAGAAGGAGATATACATATGGGTGGAGAGGATGATG                                                                         | <i>NIPP1</i> forward             |
| nd14        | CTTGCATGCCTGCAGGAGATTTACAGATCCTCTTCTGAGAT<br>GAGTTTTTGTTCGTTCCGAAAGCGACCAAC                                     | <i>NIPP1</i> forward             |
| nd15        | ATGTATATCTCCTTCTTAAATCTAGAGGTC                                                                                  | <i>Plac-GFP</i> backbone forward |
| nd16        | GAACAAAAACTCATCTCAGAAGAGGATCTGTAAATCTCCTG<br>CAGGCATGCA                                                         | <i>Plac-GFP</i> backbone reverse |
| nd17        | AAAAAA GAGCTC GTTAGCAATTTAACTGTGATAAAC                                                                          | <i>Plac-NIPP1-CD</i> reverse     |
| ch1         | TCAATCTCCTGCAGGCATGCTTTACACTTTTATGCTTCCGGC<br>TCGTATAATAAAAAAAAAAAGGAGGAAAAAAAAATGGAAGA<br>TGCCAAAAACATTAAGAA   | Luciferase forward               |
| ch2         | GGGGCGTAATTTGATATCAAGCTTTACACGGCGATCTTGCC<br>G                                                                  | Luciferase reverse               |
| ch3         | AGCTTGATATCAAATTACGCCCC                                                                                         | P6 backbone forward              |
| ch4         | GCATGCCTGCAGGAGATTGA                                                                                            | P6 backbone reverse              |
| vr46        | AAAAAACCATGGGTTAATAAAAGGAGGAATATATATGCATA<br>CATCCGAGTTGCTAAAACA                                                | <i>flhDC</i> forward             |
| vr47        | AAAAAACTCGAGAAAAATTAACAGCCTGTTCGATCTGTTCA<br>T                                                                  | <i>flhDC</i> reverse             |
| vr394       | CCGCATAGTTAAGCCAGTATACATTTACACTTTTATGCTTCCG<br>GCTCGTATAATAAAAAAAAAAAGGAGGAAAAAAAAATGAGTAA<br>AGGAGAAGAACTTTTCA | <i>Plac-GFP</i> backbone forward |
| vr395       | TCACGTAGCGATAGCGGAGTTACAGATCCTCTTCTGAGATG<br>AGTTTTTGTTCCTTTGTATAGTTCATCCATGCCAT                                | <i>Plac-GFP</i> backbone reverse |
| vr385       | CTCCGCTATCGCTACGTGA                                                                                             | P3 backbone forward              |
| vr386       | TGTATACTGGCTTAACTATGCGG                                                                                         | P3 backbone reverse              |

|       |                                                                                      |                              |
|-------|--------------------------------------------------------------------------------------|------------------------------|
| vr424 | GCTTGTCTGCTCCCGGCATCGTACGTTTTTCGTTCCATTGG                                            | <i>asd</i> forward           |
| vr425 | AGACGGTACAGCTTGTCTGTATCTGCGTTTACTCCTGTAT<br>TAC                                      | <i>asd</i> reverse           |
| vr426 | ACAGACAAGCTGTGACCGTCT                                                                | backbone forward             |
| vr427 | ATGCCGGGAGCAGACAAGC                                                                  | backbone reverse             |
| vr269 | CGCAGCGAGTCAGTGAGCACATGTCACATAAAACACTAGC<br>ACT                                      | <i>Pssej-GFP-myc</i> forward |
| vr270 | CGCACAGATGCGTAAGGAGAATTACAGATCCTCTTCTGAGA<br>TGAGTTTTTGTTCCTTTGTATAGTTCATCCATGCCATG  | <i>Pssej-GFP-myc</i> reverse |
| vr271 | GCTCACTGACTCGCTGCG                                                                   | P3 backbone reverse          |
| vr272 | TTCTCCTTACGCATCTGTGCG                                                                | P3 backbone forward          |
| vr398 | ATCTGTGCGGTATTTACACCACATGTCACATAAAACACTA<br>GCACT                                    | <i>Pssej-LysE</i> forward    |
| vr399 | TACTGAGAGTGCACCATATGCTCACTCCTTCCGCACGTAAT<br>TT                                      | <i>Pssej-LysE</i> reverse    |
| vr396 | GCATATGGTGCACTCTCAGTA                                                                | P2 backbone forward          |
| vr397 | GGTGTGAAATACCGCACAGAT                                                                | P2 backbone reverse          |
| vr466 | GGGCTAACAGGAGGAATTAACCATGGCTCAGGTGCAGCTG<br>G                                        | Actin nanobody forward       |
| vr467 | TACCAGCTGCAGATCTCGAGTTACTTGTGTCATCGTCTTT<br>GTAGTCCATGCTTCTTGAGGAGACGGTGA            | Actin nanobody reverse       |
| vr448 | CTCGAGATCTGCAGCTGGTA                                                                 | P8 backbone forward          |
| vr449 | GGTTAATTCCTCCTGTTAGCCC                                                               | P8 backbone reverse          |
| vr450 | GGGCTAACAGGAGGAATTAACCATGGACTACAAAGACGAT<br>GACGACAAGATGGAGAACACTGAAAACCTCAGTG       | N-term FLAG-Casp<br>forward  |
| vr451 | TACCAGCTGCAGATCTCGAGTTACAGATCCTCTTCTGAGAT<br>GAGTTTTTGTTCGTGATAAAAATAGAGTTCTTTTGTGAG | C-term myc-Casp3<br>reverse  |

## Supplementary References

- 1 Mosberg, J. A., Lajoie, M. J. & Church, G. M. Lambda red recombineering in *Escherichia coli* occurs through a fully single-stranded intermediate. *Genetics* **186**, 791-799, doi:10.1534/genetics.110.120782 (2010).
- 2 Swofford, C. A., Van Dessel, N. & Forbes, N. S. Quorum-sensing *Salmonella* selectively trigger protein expression within tumors. *Proceedings of the National Academy of Sciences of the United States of America* **112**, 3457-3462, doi:10.1073/pnas.1414558112 (2015).
- 3 Vaidya, S., Velazquez-Delgado, E. M., Abbruzzese, G. & Hardy, J. A. Substrate-induced conformational changes occur in all cleaved forms of caspase-6. *J Mol Biol* **406**, 75-91, doi:10.1016/j.jmb.2010.11.031 (2011).
- 4 Yan, Y. *et al.* Asd-based balanced-lethal system in attenuated *Edwardsiella tarda* to express a heterologous antigen for a multivalent bacterial vaccine. *Fish & shellfish immunology* **34**, 1188-1194, doi:10.1016/j.fsi.2013.01.027 (2013).
- 5 Nakayama, K., Kelly, S. M. & Curtiss, R. Construction of an ASD+ expression-cloning vector - stable maintenance and high-level expression of cloned genes in a *Salmonella* vaccine strain. *Bio-Technol* **6**, 693-697, doi:10.1038/nbt0688-693 (1988).
